# Supplementary material for: A novel visible light responsive nanosystem for cancer treatment
Source: Royal Society of Chemistry journal article supplement (doi:10.1039/c7nr05050j), 2017-01-01
Supplement: c7nr05050j1.pdf [file c7nr05050j1.pdf]

# A novel visible light responsive nanosystem for cancer treatment

## Supporting information

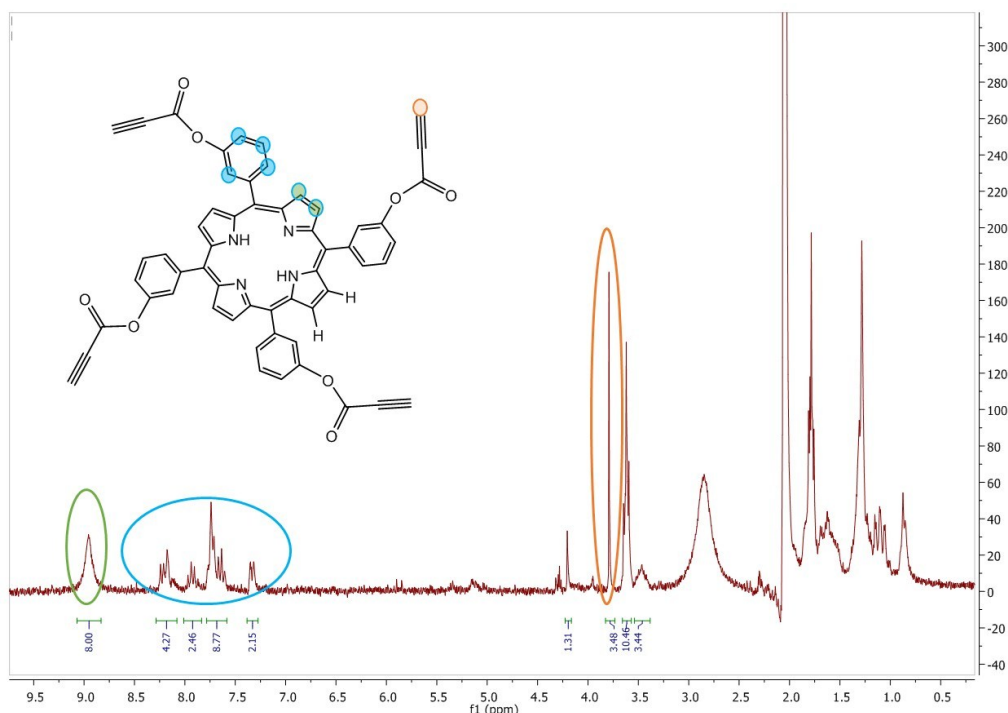

**S1.**  $^1\text{H}$ -NMR spectrum of the reaction product between 5,10,15,20-(Tetra-3-hydroxyphenyl) porphyrin and propiolic acid, product "A".

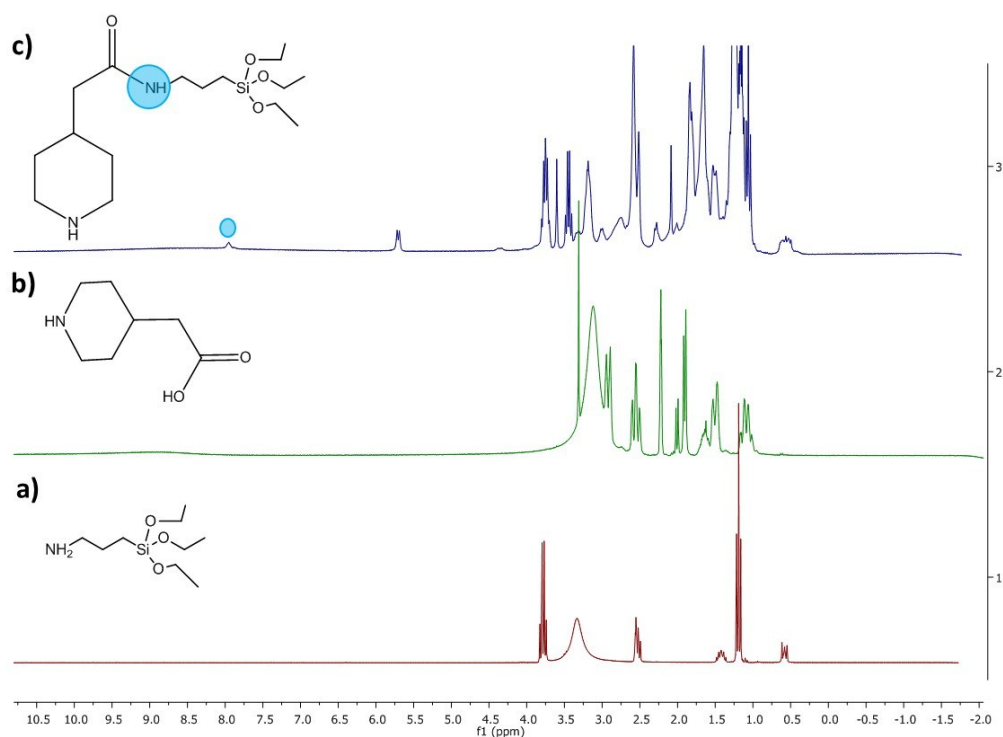

**S2.** Comparison of  $^1\text{H}$ -NMR spectra of a) APTES, b) PAH and c) their reaction product "B".

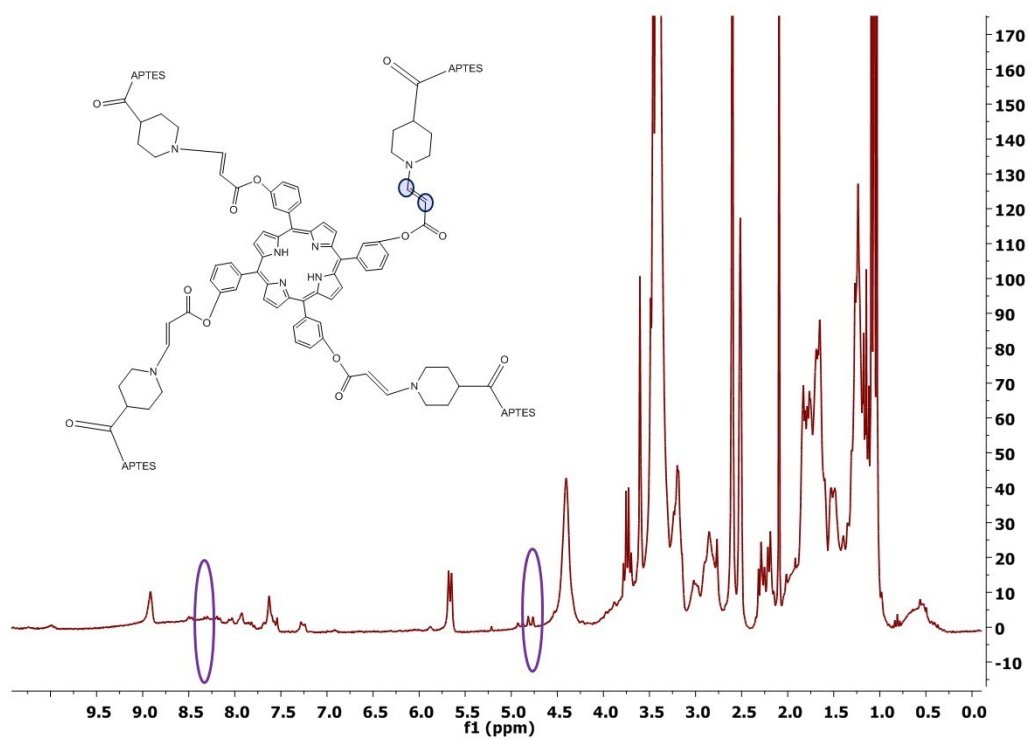

**S3.**  $^1\text{H}$ -NMR spectrum of the reaction product between "A" and "B".

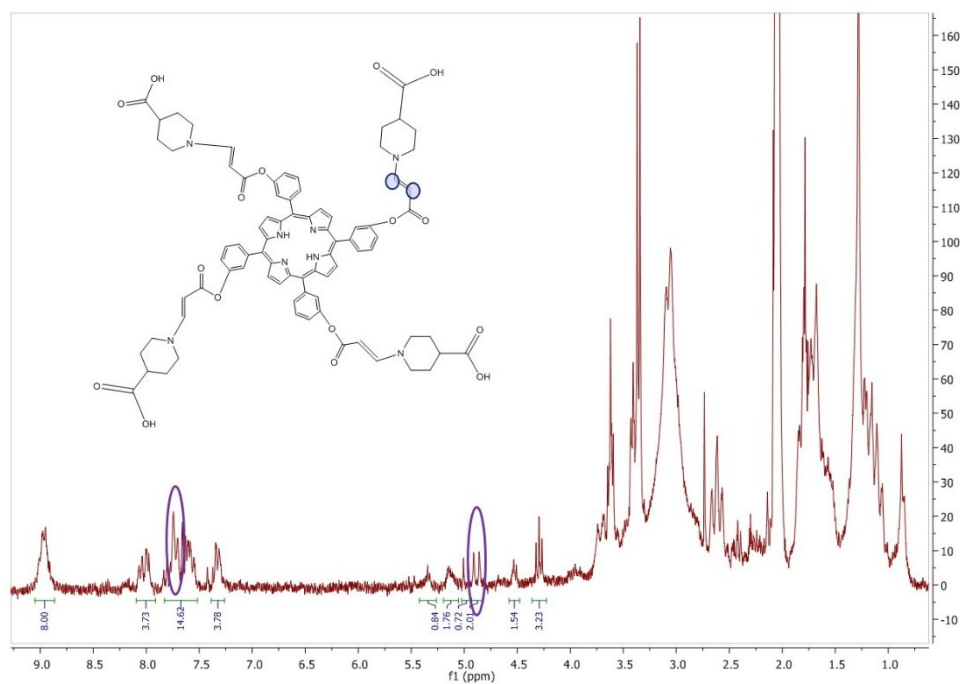

**S4.**  $^1\text{H}$ -NMR spectrum of the reaction product "C", between "A" and PAH.

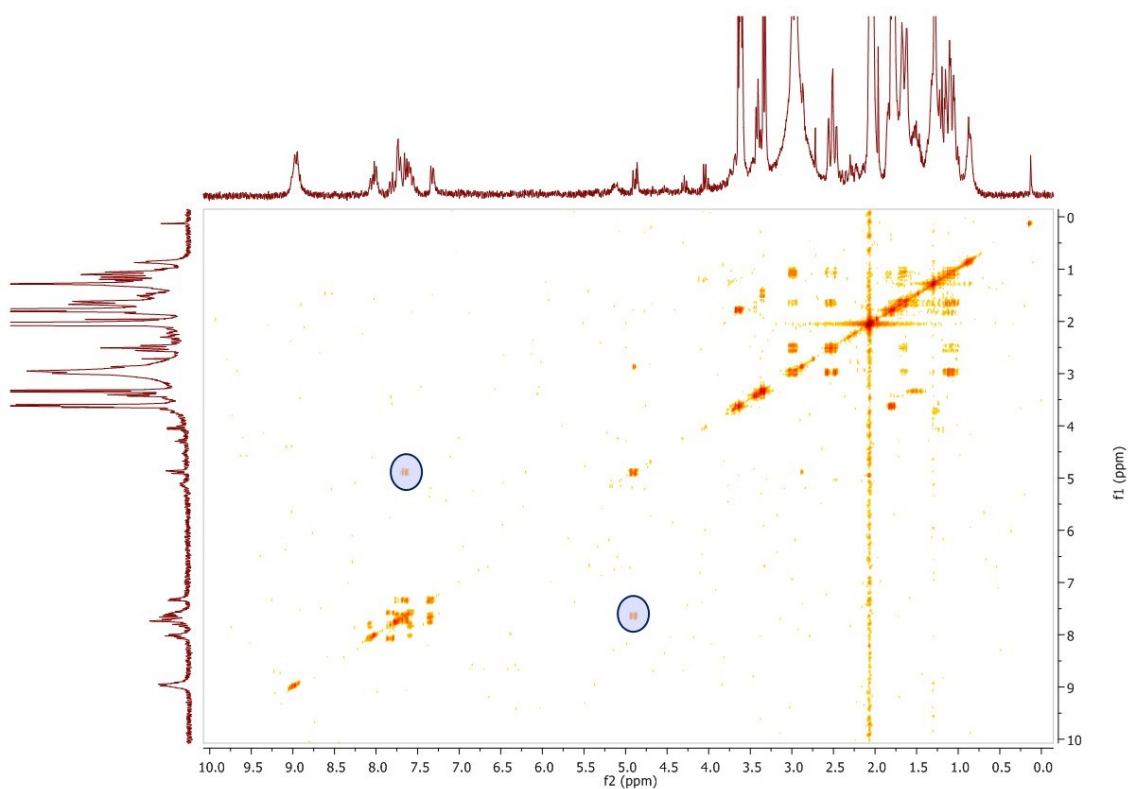

S5. COSY <sup>1</sup>H-NMR spectrum of the reaction product “C”, between “A” and PAH.

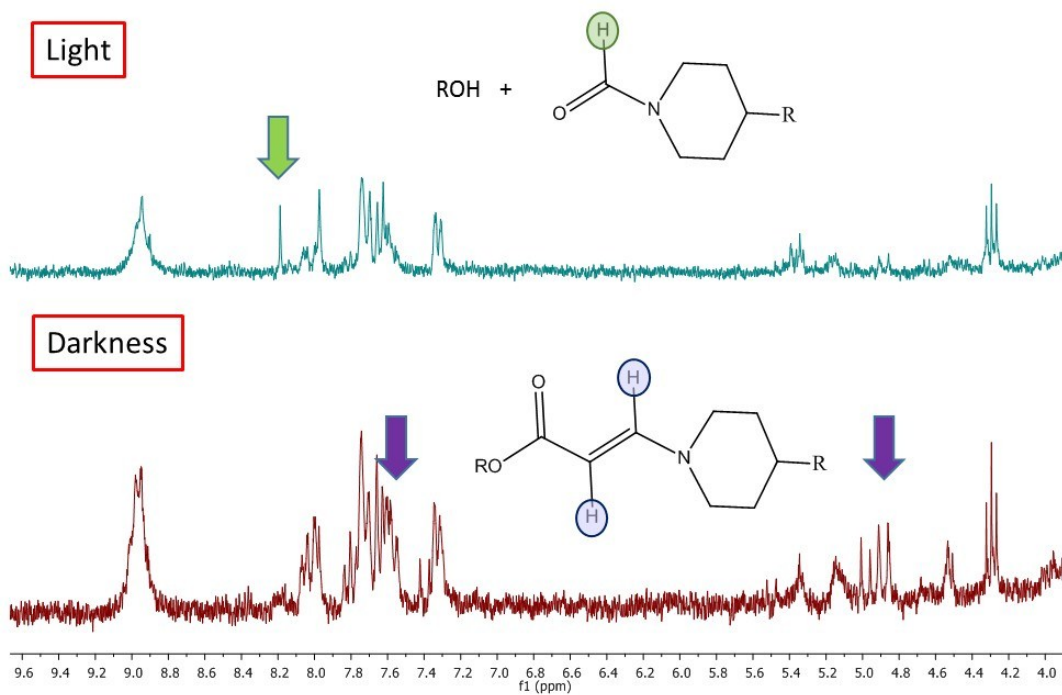

S6. <sup>1</sup>H-NMR spectra of the doubled bond photo-oxidation of the product “C”.

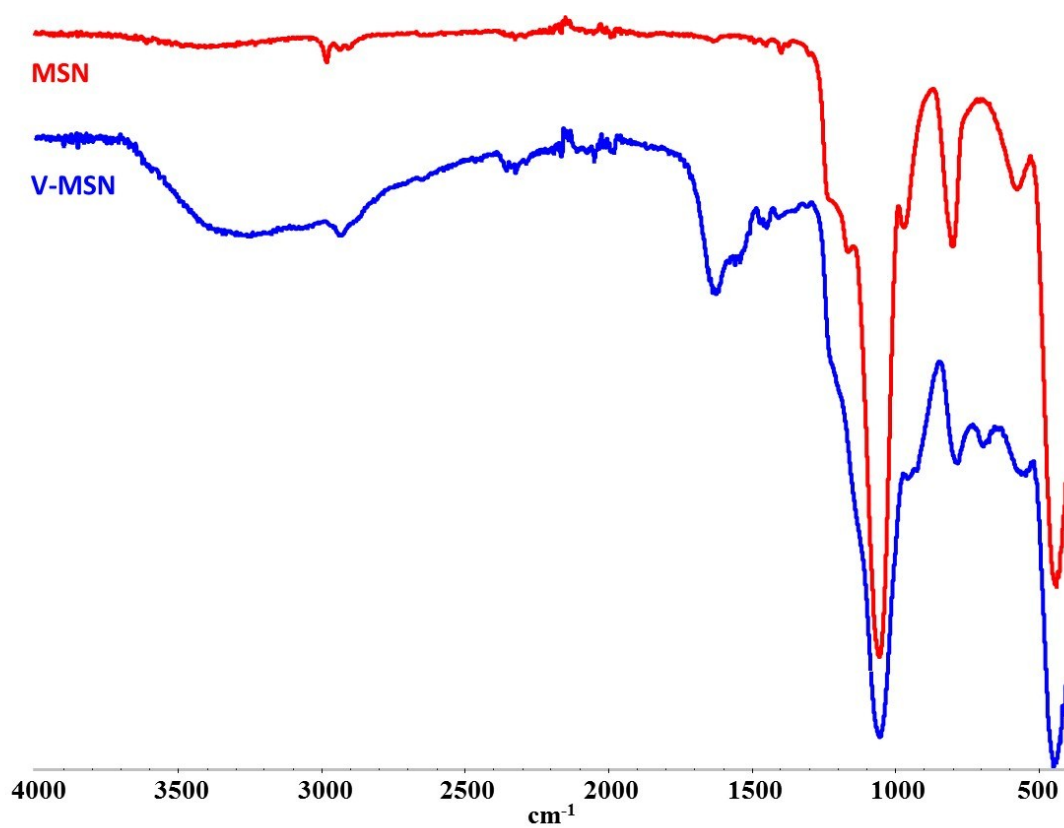

**S7.** FTIR spectrum of MSN and V-MSN

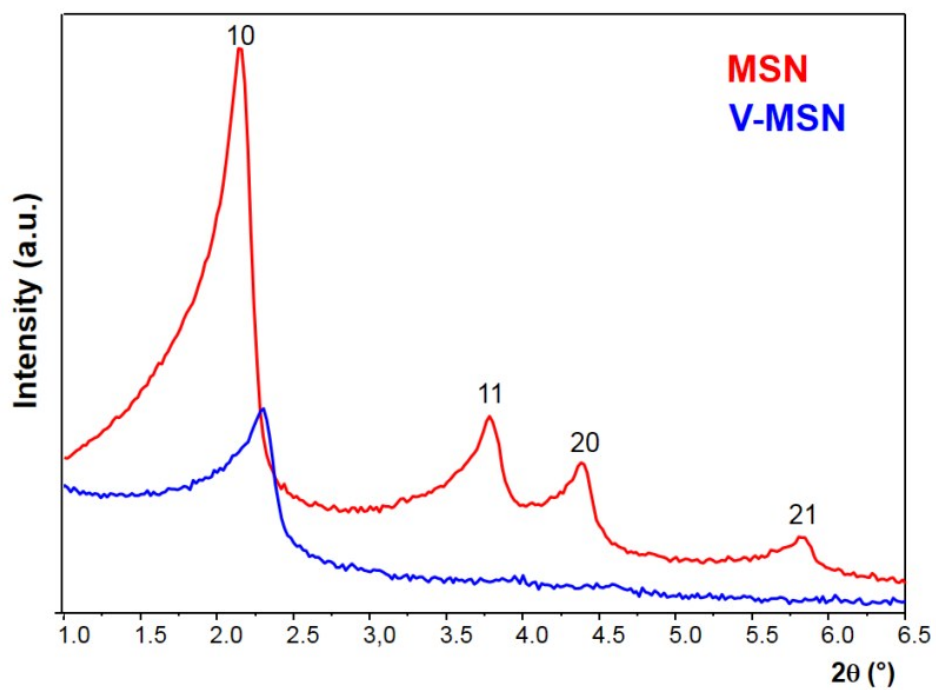

**S8.** Low-angle XRD patterns of MSN and V-MSN.

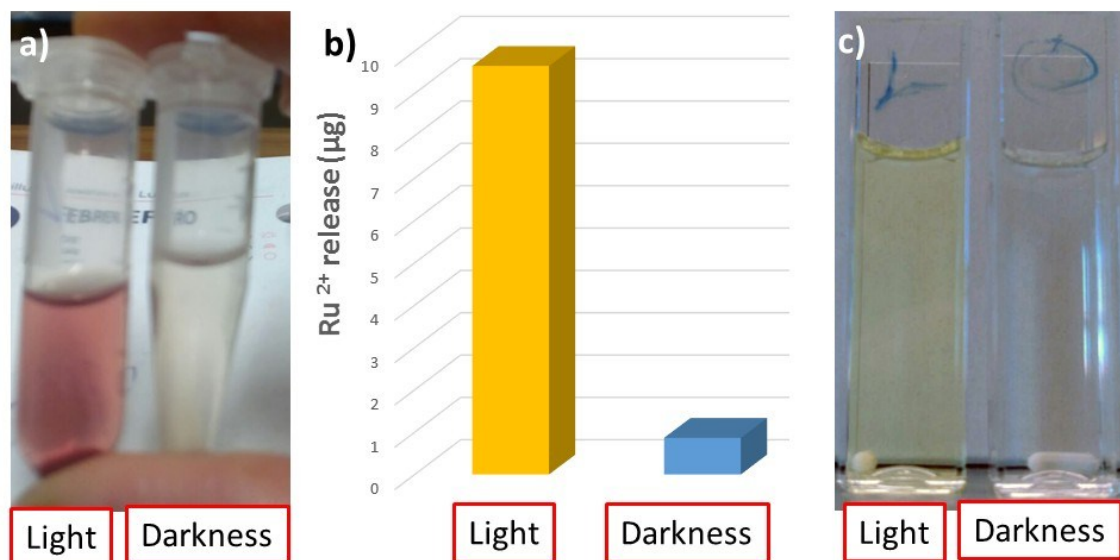

**S9. a)** Image of porphyrin release in DMSO with and without light irradiation; **b)**  $[\text{Ru}(\text{bipy})_3]^{2+}$  release from V-MSN@RBPY in the absence of light and upon visible light irradiation and **c)** Image of  $[\text{Ru}(\text{bipy})_3]^{2+}$  release in PBS with and without light irradiation.
